# Supplementary material
Source: PubMed Central journal article supplement (PMC6325211)
Supplement: e6ff2c238b9a8dd584eaa4b581d3e94d_AAC.01692-18-s0001.pdf [file e6ff2c238b9a8dd584eaa4b581d3e94d_AAC.01692-18-s0001.pdf]

Supplementary Table 1. Characteristics of parental *Candida glabrata* isolates

| Isolate               | Prior EC exposure (days) | MIC (µg/mL) |       |       | MFC (µg/mL) |       |       | MPC (µg/mL) |       |       |
|-----------------------|--------------------------|-------------|-------|-------|-------------|-------|-------|-------------|-------|-------|
|                       |                          | AFG         | CAS   | MFG   | AFG         | CAS   | MFG   | AFG         | CAS   | MFG   |
| <b>Cg-36</b>          | No                       | 0.03        | 0.06  | 0.03  | 0.12        | 0.25  | 0.06  | 0.5         | 1     | 0.06  |
| <b>Cg-111</b>         | No                       | 0.06        | 0.06  | 0.03  | 0.12        | 0.5   | 0.06  | 0.25        | 2     | 0.06  |
| <b>Cg-171</b>         | No                       | 0.03        | 0.06  | 0.03  | 0.12        | 0.5   | 0.06  | 0.5         | 2     | 0.06  |
| <b>Cg-5</b>           | No                       | 0.06        | 0.12  | 0.03  | 0.25        | 0.5   | 0.06  | 1           | >16   | 0.12  |
| <b>Cg-176</b>         | No                       | 0.06        | 0.12  | 0.03  | 0.25        | 0.5   | 0.06  | 1           | >16   | 0.06  |
| <b>Cg-11</b>          | No                       | 0.03        | 0.25  | 0.03  | 0.25        | 1     | 0.06  | 0.5         | 4     | 0.06  |
| <b>Cg-193</b>         | No                       | 0.06        | 0.25  | 0.015 | 0.25        | 1     | 0.015 | 0.5         | 2     | 0.03  |
| <b>Cg-201</b>         | No                       | 0.06        | 0.25  | 0.03  | 0.12        | 1     | 0.03  | 0.5         | 2     | 0.03  |
| <b>Cg-473</b>         | No                       | 0.06        | 0.25  | 0.03  | 0.25        | 1     | 0.12  | 1           | >16   | 0.12  |
| <b>Cg-487</b>         | No                       | 0.03        | 0.5   | 0.03  | 0.12        | 2     | 0.03  | 0.5         | 8     | 0.06  |
| <b>Cg-333</b>         | Yes (3)                  | 0.06        | 0.25  | 0.03  | 0.25        | 2     | 0.03  | 1           | >16   | 0.12  |
| <b>Cg-4</b>           | Yes (4)                  | 0.06        | 0.25  | 0.015 | 0.5         | 1     | 0.06  | 0.5         | 4     | 0.06  |
| <b>Cg-911</b>         | Yes (6)                  | 0.06        | 0.06  | 0.03  | 0.12        | 1     | 0.06  | 0.25        | 2     | 0.06  |
| <b>Cg-1488</b>        | Yes (7)                  | 0.06        | 0.25  | 0.03  | 0.25        | 1     | 0.06  | 0.5         | 1     | 0.06  |
| <b>Cg-144</b>         | Yes (12)                 | 0.03        | 1     | 0.015 | 0.12        | 4     | 0.03  | 0.5         | 8     | 0.03  |
| <b>Cg-815</b>         | Yes (15)                 | 0.06        | 0.06  | 0.03  | 0.12        | 0.5   | 0.06  | 0.25        | 1     | 0.12  |
| <b>Cg-511</b>         | Yes (17)                 | 0.06        | 0.25  | 0.03  | 0.25        | 1     | 0.12  | 0.25        | 4     | 0.12  |
| <b>Cg-647</b>         | Yes (26)                 | 0.03        | 0.12  | 0.03  | 0.25        | 0.5   | 0.03  | 0.5         | 4     | 0.06  |
| <b>Cg-680</b>         | Yes (48)                 | 0.03        | 0.12  | 0.03  | 0.25        | 0.5   | 0.06  | 1           | 2     | 0.06  |
| <b>Cg-1234</b>        | Yes (116)                | 0.12        | 0.12  | 0.03  | 0.25        | 1     | 0.06  | 0.5         | 4     | 0.06  |
| <b>Geometric mean</b> |                          | 0.049       | 0.161 | 0.027 | 0.193       | 0.841 | 0.050 | 0.518       | 4.287 | 0.064 |

AFG = Anidulafungin; CAS = Caspofungin; EC = Echinocandin; MFG = Micafungin; MIC = Minimum inhibitory concentration; MFC = Minimum fungicidal concentration; MPC = Mutation prevention concentration

Supplementary Table 2. Characteristics of isolates originating from parental *C. glabrata*

| Isolate        | Total number colonies | Number of colonies growing at $\geq$ MFC by echinocandin exposure agent |            |           | Number of colonies with $>$ 2-fold MIC increase to each echinocandin |                  |                 | Number of colonies with <i>FKS</i> mutations |
|----------------|-----------------------|-------------------------------------------------------------------------|------------|-----------|----------------------------------------------------------------------|------------------|-----------------|----------------------------------------------|
|                |                       | AFG                                                                     | CAS        | MFG       | AFG                                                                  | CAS              | MFG             |                                              |
| <i>Cg-36</i>   | 5                     | 0                                                                       | 5          | 0         | 0                                                                    | 5                | 0               | 4                                            |
| <i>Cg-111</i>  | 17                    | 2                                                                       | 15         | 0         | 7                                                                    | 12               | 7               | 7                                            |
| <i>Cg-171</i>  | 7                     | 0                                                                       | 7          | 0         | 0                                                                    | 6                | 0               | 0                                            |
| <i>Cg-5</i>    | 14                    | 2                                                                       | 10         | 2         | 4                                                                    | 10               | 3               | 1                                            |
| <i>Cg-176</i>  | 9                     | 3                                                                       | 4          | 2         | 9                                                                    | 9                | 9               | 9                                            |
| <i>Cg-11</i>   | 8                     | 1                                                                       | 6          | 1         | 4                                                                    | 8                | 4               | 4                                            |
| <i>Cg-193</i>  | 10                    | 1                                                                       | 9          | 0         | 1                                                                    | 1                | 1               | 1                                            |
| <i>Cg-201</i>  | 9                     | 9                                                                       | 0          | 0         | 8                                                                    | 1                | 0               | 0                                            |
| <i>Cg-473</i>  | 14                    | 4                                                                       | 7          | 3         | 10                                                                   | 12               | 6               | 6                                            |
| <i>Cg-487</i>  | 13                    | 8                                                                       | 5          | 0         | 7                                                                    | 7                | 7               | 2                                            |
| <i>Cg-333</i>  | 23                    | 12                                                                      | 9          | 2         | 19                                                                   | 19               | 9               | 9                                            |
| <i>Cg-4</i>    | 30                    | 5                                                                       | 25         | 0         | 8                                                                    | 29               | 8               | 6                                            |
| <i>Cg-911</i>  | 3                     | 0                                                                       | 3          | 0         | 0                                                                    | 0                | 0               | 0                                            |
| <i>Cg-1488</i> | 7                     | 3                                                                       | 4          | 0         | 4                                                                    | 6                | 2               | 2                                            |
| <i>Cg-144</i>  | 11                    | 3                                                                       | 8          | 0         | 3                                                                    | 1                | 1               | 1                                            |
| <i>Cg-815</i>  | 8                     | 0                                                                       | 8          | 0         | 1                                                                    | 5                | 1               | 0                                            |
| <i>Cg-511</i>  | 20                    | 10                                                                      | 9          | 1         | 14                                                                   | 13               | 10              | 10                                           |
| <i>Cg-647</i>  | 11                    | 1                                                                       | 9          | 1         | 4                                                                    | 10               | 4               | 4                                            |
| <i>Cg-680</i>  | 16                    | 1                                                                       | 14         | 1         | 7                                                                    | 16               | 7               | 8                                            |
| <i>Cg-1234</i> | 12                    | 9                                                                       | 2          | 1         | 9                                                                    | 8                | 8               | 8                                            |
| <b>Total</b>   | <b>247</b>            | <b>74</b>                                                               | <b>159</b> | <b>14</b> | <b>119 (48%)</b>                                                     | <b>178 (72%)</b> | <b>87 (35%)</b> | <b>82 (33%)</b>                              |

AFG = anidulafungin; CAS = caspofungin; MFG = micafungin; MFC = minimum fungicidal concentration
